# Supplementary material for: Semi-Rigid (Aminomethyl) Piperidine-Based Pentadentate Ligands for Mn(II) Complexation
Source: MDPI journal article supplement (doi:10.3390/molecules26195993), 2021-10-02
Supplement: s1 [file s1]

## Supporting Information

# Semi-rigid (aminomethyl)piperidine-based pentadentate ligands for Mn(II) complexation

Jonathan Martinelli,<sup>a</sup> Edoardo Callegari,<sup>a</sup> Zsolt Baranyai,<sup>b</sup> Alberto Fraccarollo,<sup>a</sup> Maurizio Cossi,<sup>a</sup> Lorenzo Tei<sup>a\*</sup>

<sup>a</sup> Dipartimento di Scienze e Innovazione Tecnologica, Università del Piemonte Orientale, Viale Michel 11, 15121 Alessandria, Italy;

<sup>b</sup> Bracco Research Center, Bracco Imaging SpA, Via Ribes 5, 10010 Collieretto Giacosa (TO), Italy;

## Table of contents

|                                                                                         |   |
|-----------------------------------------------------------------------------------------|---|
| 1. Fitting of <sup>1</sup> H NMRD profiles and <sup>17</sup> O NMR relaxivity data..... | 2 |
| 2. Computational modelling.....                                                         | 3 |
| 3. NMR spectra .....                                                                    | 4 |
| 4. HPLC-MS .....                                                                        | 7 |
| 5. Equilibrium studies of the Mn(II) complexes .....                                    | 9 |

## 1. Fitting of $^1\text{H}$ NMRD profiles and $^{17}\text{O}$ NMR relaxivity data

From the two contributions (inner sphere ( $r_{1,IS}$ ) and outer-sphere ( $r_{1,OS}$ )) to the longitudinal proton relaxation rate ( $r_1$ ) (eq. 1), the former one is considered for the fitting of  $^1\text{H}$  NMRD profiles (1).

$$r_1 = r_{1,IS} + r_{1,OS} \quad (1)$$

According to the Solomon–Bloembergen theory, the  $r_{1,IS}$  is dominated by the dipolar interaction (eqs. 2 and 3), where  $q$  is the number of water molecules directly coordinated to the Mn-ion,  $T_{1M}$  is their longitudinal relaxation time,  $\tau_M$  is the water-exchange correlation time (2-4).

$$r_{1,IS} = \frac{q}{55556(T_{1M} + \tau_M)} \quad (2)$$

$$\frac{1}{T_{1M}} = \frac{2}{15} \left( \frac{\mu_0}{4\pi} \right)^2 \frac{\hbar^2 \gamma_S^2 \gamma_I^2}{r_{MnH}^6} S(S+1) \left( \frac{3\tau_{d1}}{1 + \omega_I^2 \tau_{d2}^2} \right) \quad (3)$$

Here,  $r_{MnH}$  is the distance between the proton of a bound  $\text{H}_2\text{O}$  molecule and Mn-ion (fixed at 3.0 Å),  $\mu_0/4\pi$  is the magnetic permeability in vacuum,  $S$  is the electron spin (7/2),  $\gamma_I$  and  $\gamma_S$  are the gyromagnetic ratios, and  $\omega_I$  and  $\omega_S$  are the Larmor frequencies of the proton and electron, resp.  $T_{ie}$  ( $i = 1, 2$ ) represents electronic relaxation time that contributes to  $\tau_{di}^{-1} = \tau_M^{-1} + \tau_R^{-1} + T_{ie}^{-1}$ , expressed by eqs. 4 and 5 due to zero-field splitting (ZFS) (5).

$$\frac{1}{T_{1e}} = \frac{1}{25} \Delta^2 \tau_V [4S(S+1) - 3] \left( \frac{1}{1 + \omega_S^2 \tau_V^2} + \frac{1}{1 + 4\omega_S^2 \tau_V^2} \right) \quad (4)$$

$$\frac{1}{T_{2e}} = \Delta^2 \tau_V \left( \frac{5.26}{1 + 0.372\omega_S^2 \tau_V^2} + \frac{7.18}{1 + 1.24\omega_S^2 \tau_V^2} \right) \quad (5)$$

Here,  $\Delta^2$  represents the mean-squared fluctuation of the ZFS,  $\tau_v$  is the correlation time for the instantaneous distortion of the coordination polyhedron of Gd-ion. The outer-sphere contribution to the relaxivity ( $r_{1,OS}$ ) is described by eqs. 6 and 7, where  $N_A$  is the Avogadro's number,  $a_{GdH}$  the distance of diffusing water molecule in the closest approach to Gd-ion (fixed at 4.0 Å),  $D_{GdH}$  is diffusion coefficient and  $J_{OS}(\omega_S, T_{je})$  ( $j = 1, 2$ ) are spin density functions (6).

$$r_{1,IS} = \left( \frac{32\pi}{405} \right) \left( \frac{\mu_0}{4\pi} \right)^2 \gamma_I^2 \gamma_S^2 \hbar^2 S(S+1) \frac{N_A}{a_{MnH} D_{MnH}} [3J_{OS}(\omega_I, T_{1e}) + 7J_{OS}(\omega_S, T_{1e})] \quad (6)$$

$$J_{OS}(\omega_I, T_{je}) = \text{Re} \left\{ \frac{1 + \frac{1}{4} \left[ i\omega \tau_{MnH} + \left( \frac{\tau_{MnH}}{T_{je}} \right) \right]^{\frac{1}{2}}}{1 + \left[ i\omega \tau_{MnH} + \left( \frac{\tau_{MnH}}{T_{je}} \right) \right]^{\frac{1}{4}} + \frac{4}{9} \left[ i\omega \tau_{MnH} + \left( \frac{\tau_{MnH}}{T_{je}} \right) \right] + \frac{1}{9} \left[ i\omega \tau_{MnH} + \left( \frac{\tau_{MnH}}{T_{je}} \right) \right]^{\frac{1}{2}}} \right\} \quad (7)$$

All correlation times  $\tau$  ( $X = R, M, V$ ) exhibit an exponential dependence (eq. 8), where  $E_X$  are activation energies (fixed at  $E_V = 1 \text{ kJ mol}^{-1}$ ,  $E_R = 1 \text{ kJ mol}^{-1}$ ) and  $R$  is the gas constant, leading to a temperature dependent diffusion coefficient  $D$  (fixed at  $2.24 \times 10^{-5} \text{ cm}^2 \text{ s}^{-1}$  for 298.15K).

$$\tau_X^T = \tau_X^{298} \exp \left[ \frac{E_X}{R} \left( \frac{1}{T} - \frac{1}{298.15} \right) \right] \quad (8)$$

$$D_{MnH}^T = D_{MnH}^{298} \exp \left[ \frac{E_D}{R} \left( \frac{1}{298.15} - \frac{1}{T} \right) \right] \quad (9)$$

Mn-induced water  $^{17}\text{O}$  longitudinal and transverse relaxation rates ( $1/T_{1r}$  and  $1/T_{2r}$ ) and angular frequencies ( $\Delta_{\omega r}$ ) were calculated using eqs. 10 and 11 (7-8).

$$\frac{1}{T_{1r}} = \frac{1}{T_{1M} + \tau_M} \quad (10)$$

$$\frac{1}{T_{2r}} = \frac{1}{\tau_M} \frac{1}{T_{1M} + \tau_M} \quad (11)$$

## 2. Computational modeling

**Table S1:** Calculated bond distances for Mn complexes with AMPTA.

| Mn((S)-AMPTA) | Distance (Å)          | Mn((R)-AMPTA) |
|---------------|-----------------------|---------------|
| 2.093         | Mn-O <sub>water</sub> | 2.093         |
| 2.138         | Mn-N2                 | 2.137         |
| 2.074         | Mn-N1                 | 2.075         |
| 2.020         | Mn-O                  | 2.021         |
| 2.008         | Mn-O1                 | 2.008         |
| 2.054         | Mn-O2                 | 2.054         |

**Table S2:** Calculated bond distances for Mn complexes with AMPDA-HB.

| Mn((S)-AMPDA-HB) | Distance (Å)          | Mn((R)-AMPDA-HB) |
|------------------|-----------------------|------------------|
| 2.103            | Mn-O <sub>water</sub> | 2.103            |
| 2.145            | Mn-N2                 | 2.145            |
| 2.078            | Mn-N1                 | 2.078            |
| 2.042            | Mn-O                  | 2.042            |
| 2.000            | Mn-O1                 | 2.000            |
| 2.067            | Mn-O2                 | 2.067            |

### 3. NMR Spectra

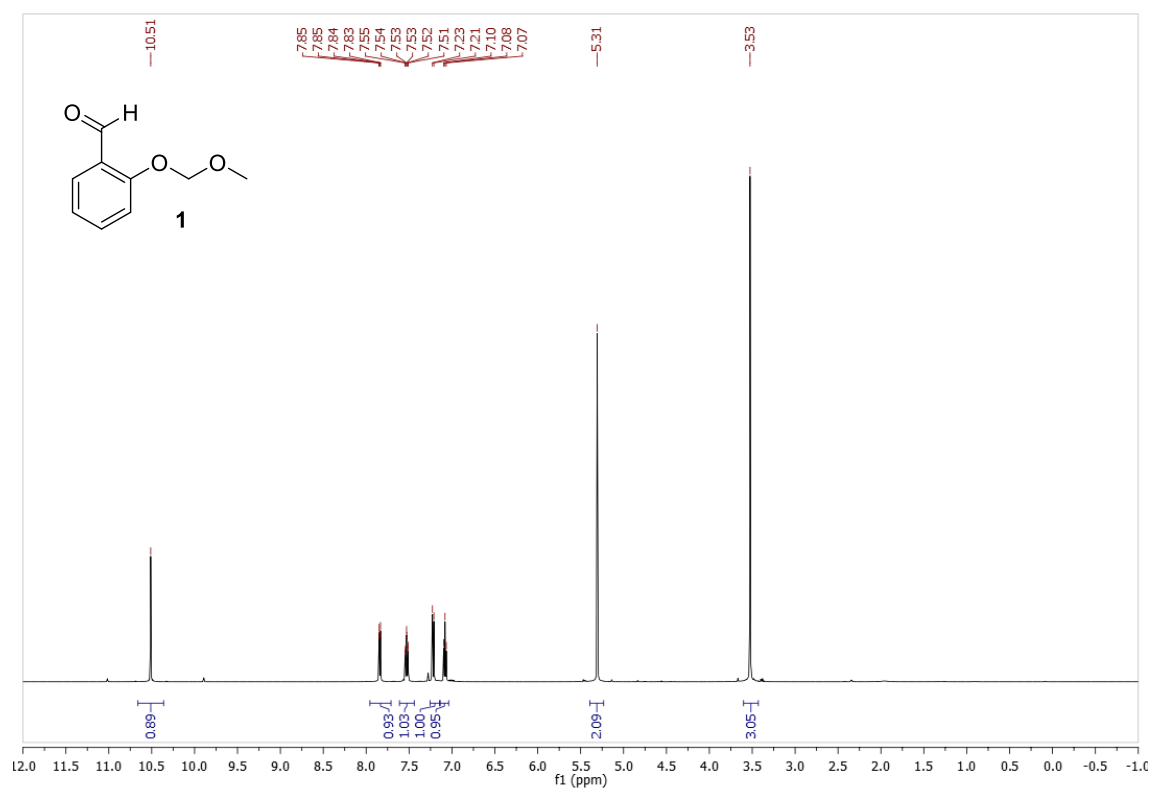

**Figure S1.** <sup>1</sup>H NMR spectrum in CDCl<sub>3</sub> of protected salicylaldehyde **1**.

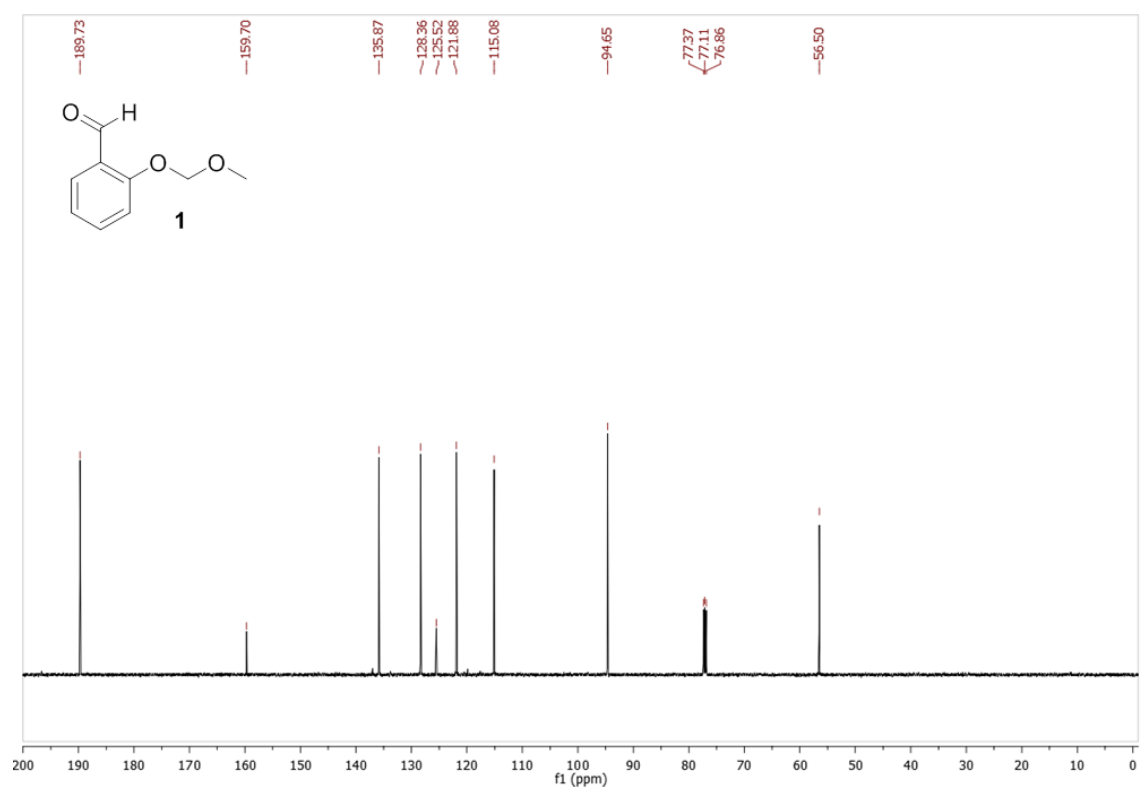

**Figure S2.** <sup>13</sup>C NMR spectrum in CDCl<sub>3</sub> of protected salicylaldehyde **1**.

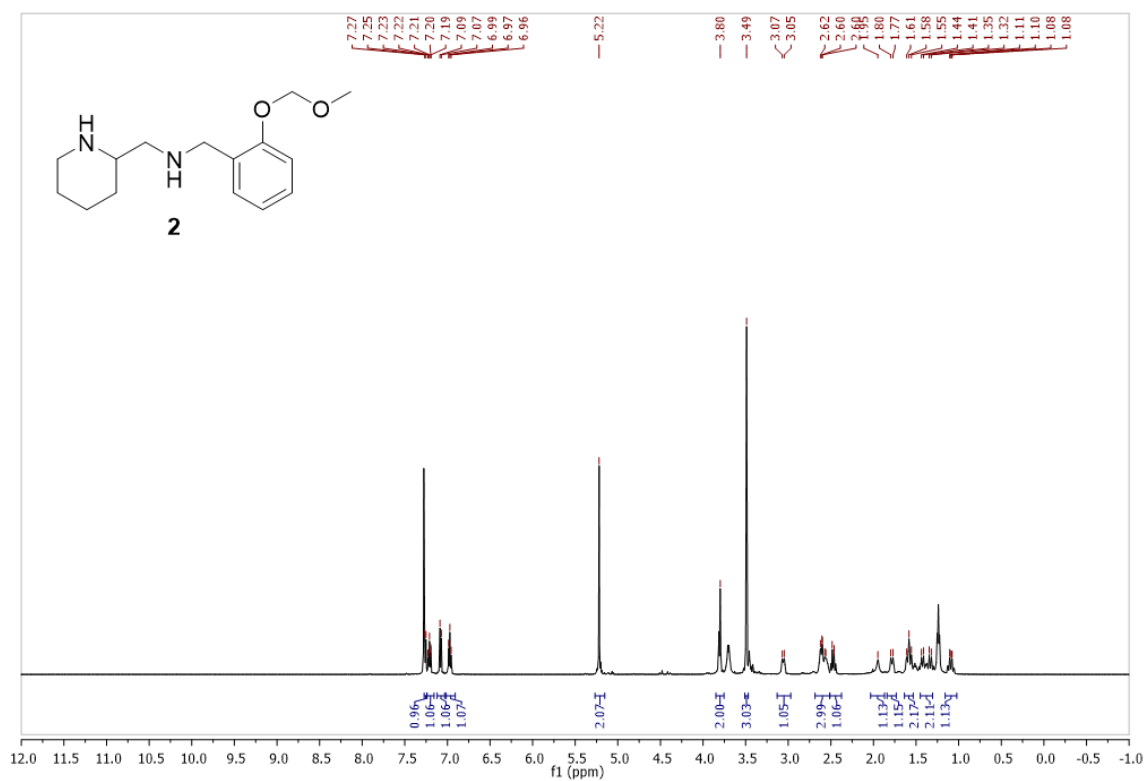

**Figure S3.** <sup>1</sup>H NMR spectrum in CDCl<sub>3</sub> of intermediate **2** (signals from residual EtOH at 3.67 and 1.22 ppm are also observable).

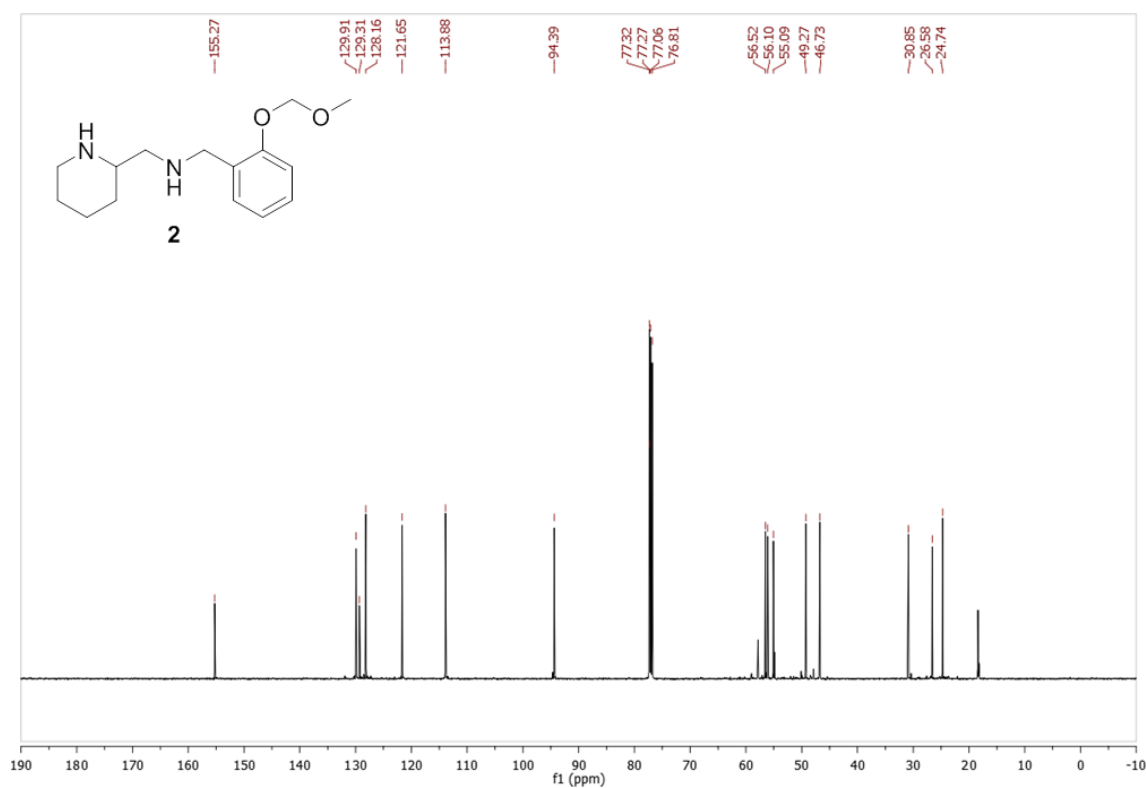

**Figure S4.** <sup>13</sup>C NMR spectrum in CDCl<sub>3</sub> of intermediate **2** (signals from residual EtOH at 18.4 and 57.8 ppm are also observable).



#### 4. HPLC-MS

Analytical HPLC gradient conditions for AMPDA-HB and (*R*)-AMPTA:

Solvent A = H<sub>2</sub>O (TFA 0.1%); solvent B = ACN (TFA 0.1%); flow = 1 mL/min;

| Time (min) | Solvent A (%) | Solvent B (%) |
|------------|---------------|---------------|
| 0          | 99            | 1             |
| 2,00       | 99            | 1             |
| 16,00      | 0             | 100           |
| 19,00      | 0             | 100           |

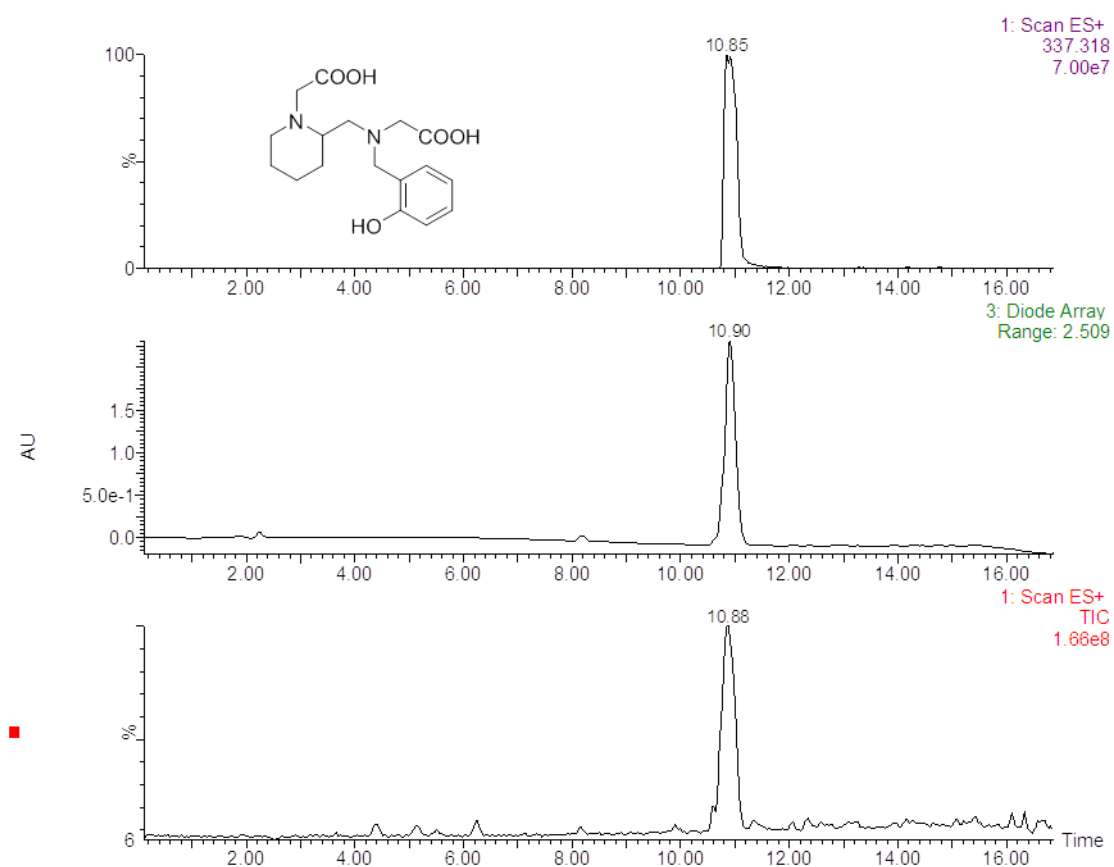

**Figure S7.** ESI<sup>+</sup> MS (*bottom*), UV (254 nm, *middle*) and specific ion (M+H<sup>+</sup>, *top*) HPLC chromatograms of AMPDA-HB (*t<sub>R</sub>* = 10.9 min) prepared according to the new method.

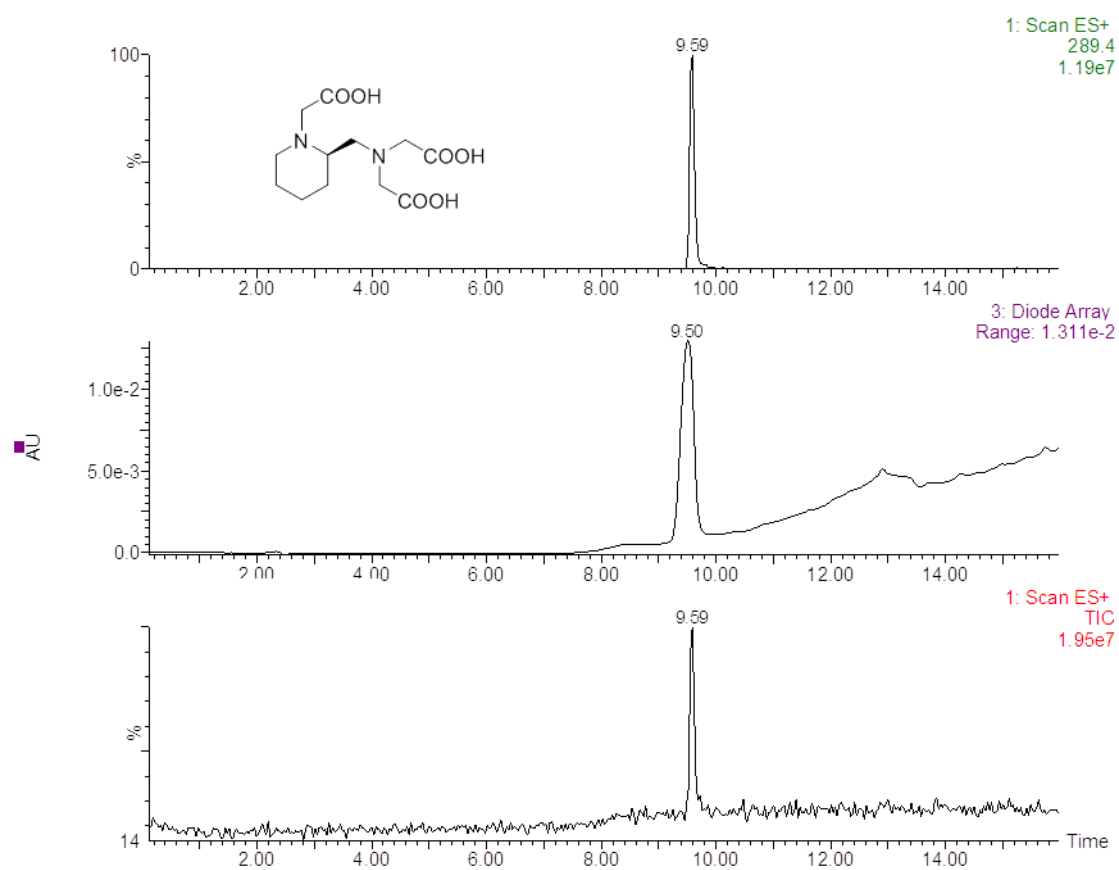

**Figure S8.** ESI<sup>+</sup> MS (*bottom*), UV (254 nm, *middle*) and specific ion ( $M+H^+$ , *top*) HPLC chromatograms of (*R*)-AMPTA ( $t_R = 9.5$  min).



## 5. Equilibrium studies of the Mn(II) complexes

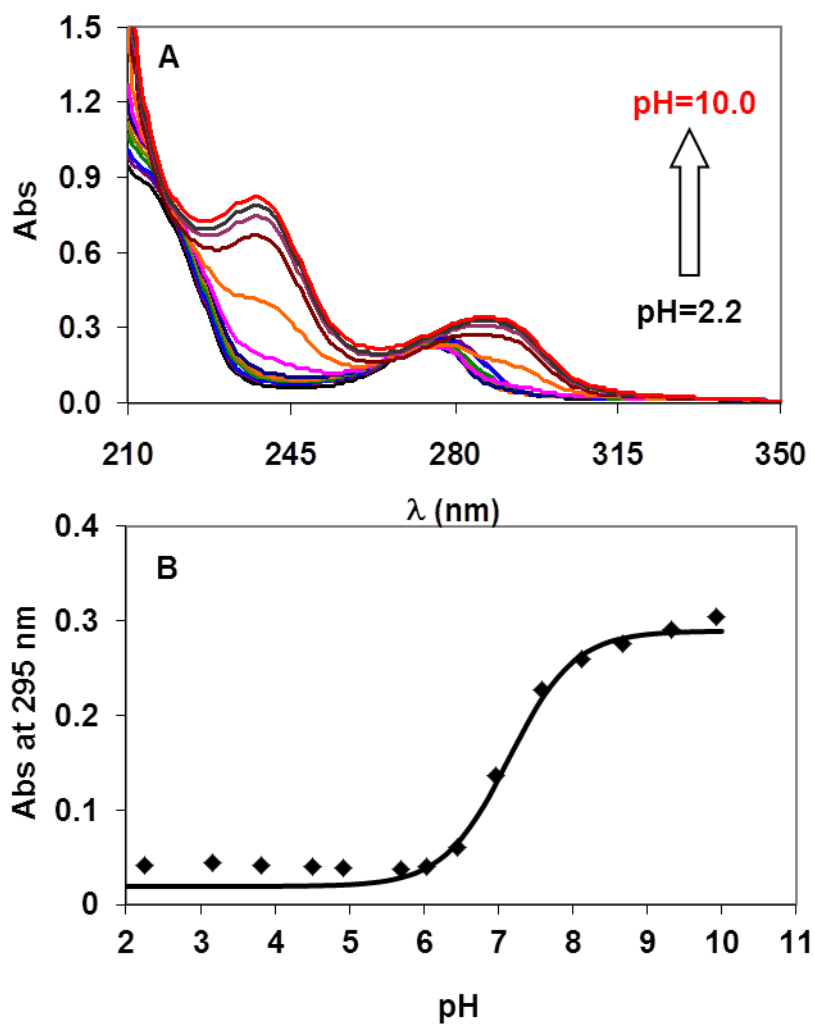

**Figure S9.** Absorption spectra (A) and absorbance values at 295 nm (B) of Mn<sup>2+</sup>-AMPDA-HB system as a function of pH ( $[\text{Mn}^{2+}] = [\text{AMPDA-HB}] = 1.0 \times 10^{-4}$  M,  $l = 1.0$  cm, 0.15 M NaCl, 25 °C).

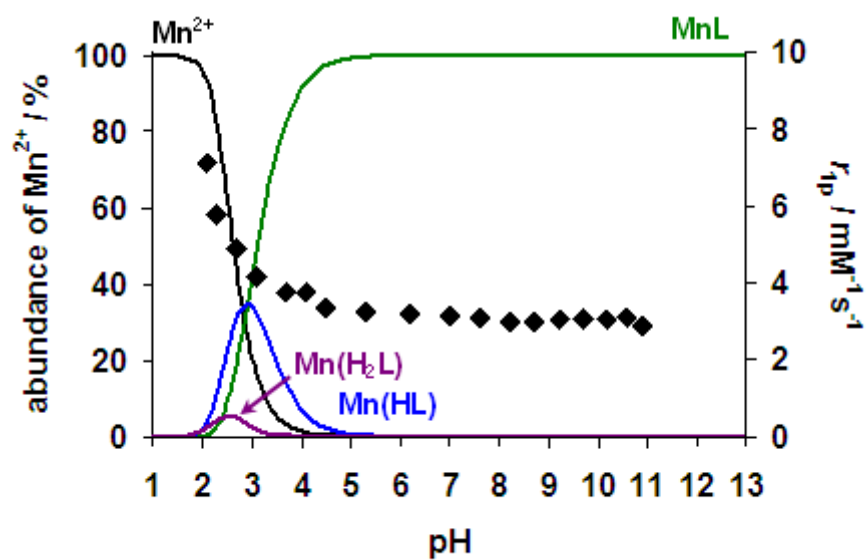

**Figure S10.** Species distribution and relaxivity values (◆) of Mn<sup>2+</sup>-CDTA system as a function of pH ([Mn<sup>2+</sup>] = [CDTA] = 1.0 mM, 20 MHz, 0.15 M NaCl, 25 °C).
